# Supplementary material for: Conformational preferences of β-sheet structures in cyclopropane-containing γ-peptides
Source: Royal Society of Chemistry journal article supplement (doi:10.1039/c5nj00545k), 2015-01-01
Supplement: c5nj00545k1.pdf [file c5nj00545k1.pdf]

## Supplementary information

# Conformational preferences of $\beta$ -sheet structures in cyclopropane-containing $\gamma$ -peptides

Ji Hyang Lee,<sup>a</sup> Hae Sook Park<sup>b</sup> and Young Kee Kang<sup>\*a</sup>

<sup>a</sup> Department of Chemistry and BK21 PLUS Research Team, Chungbuk National University, Cheongju, Chungbuk 361-763, Republic of Korea. E-mail: ykkang@chungbuk.ac.kr; Fax: +82-43-273-2991; Tel: +82-43-261-2285

<sup>b</sup> Department of Nursing, Cheju Halla University, Cheju 690-708, Republic of Korea.

| Page | Contents                                                                                                                                                                    |
|------|-----------------------------------------------------------------------------------------------------------------------------------------------------------------------------|
| s1   | Table of Contents                                                                                                                                                           |
| s2   | <b>Table S1</b> Geometric parameters and strengths of inter-strand H-bonds of $\beta$ -sheets of the Ac-( $\gamma$ Amc <sub>3</sub> - <b>1</b> ) <sub>2</sub> -NHMe peptide |
| s3   | <b>Table S2</b> Geometric parameters and strengths of inter-strand H-bonds of $\beta$ -sheets of the Ac-( $\gamma$ Amc <sub>3</sub> - <b>1</b> ) <sub>4</sub> -NHMe peptide |
| s4   | <b>Table S3</b> Geometric parameters and strengths of inter-strand H-bonds of $\beta$ -sheets of the Ac-( $\gamma$ Amc <sub>3</sub> - <b>1</b> ) <sub>6</sub> -NHMe peptide |
| s5   | <b>Table S4</b> Deformation energies of $\beta$ -sheets of Ac-( $\gamma$ Amc <sub>3</sub> - <b>1</b> ) <sub>n</sub> -NHMe peptides                                          |

**Table S1** Geometric parameters and strengths of inter-strand H-bonds of  $\beta$ -sheets of the Ac-( $\gamma$ Amc<sub>3</sub>-**1**)<sub>2</sub>-NHMe peptide<sup>a</sup>

| Type <sup>b</sup> | N–H $\cdots$ O H-bonds |                              |                                    |                    | C–H $\cdots$ O H-bonds |                              |                                    |                   |
|-------------------|------------------------|------------------------------|------------------------------------|--------------------|------------------------|------------------------------|------------------------------------|-------------------|
|                   | HB <sup>c</sup>        | $d(\text{NH}\cdots\text{O})$ | $\theta(\text{N–H}\cdots\text{O})$ | $\Delta E_2^d$     | HB <sup>c</sup>        | $d(\text{CH}\cdots\text{O})$ | $\theta(\text{C–H}\cdots\text{O})$ | $\Delta E_2^d$    |
| <b>p</b>          | I <sub>a</sub>         | 1.92                         | 173.6                              | 8.64               | II <sub>a</sub>        | 2.64                         | 140.9                              | 0.17              |
|                   | I <sub>b</sub>         | 1.91                         | 161.4                              | 9.15               | II <sub>b</sub>        | 2.42                         | 135.4                              | 0.68              |
|                   | I <sub>c</sub>         | 1.93                         | 167.5                              | 6.18               | II <sub>c</sub>        | 2.47                         | 139.2                              | 0.94              |
|                   | av.                    | 1.92                         | 167.5                              | 23.97 <sup>e</sup> | av.                    | 2.51                         | 138.5                              | 1.79 <sup>e</sup> |
| <b>ap</b>         | I <sub>a</sub> '       | 1.94                         | 167.0                              | 6.94               | II <sub>a</sub> '      | 2.47                         | 138.5                              | 0.75              |
|                   | I <sub>b</sub> '       | 2.01                         | 160.4                              | 6.56               | II <sub>b</sub> '      | 2.31                         | 141.8                              | 1.27              |
|                   | I <sub>c</sub> '       | 2.07                         | 152.0                              | 2.32               | II <sub>c</sub> '      | 2.76                         | 110.0                              | 0.03              |
|                   | av.                    | 2.01                         | 159.8                              | 15.82 <sup>e</sup> | av.                    | 2.51                         | 130.1                              | 2.05 <sup>e</sup> |

<sup>a</sup> Optimized at the M06-2X/6-31+G(d) level of theory; all distances and angles are in Å and degrees, respectively. <sup>b</sup> **p** and **ap** denote parallel and antiparallel  $\beta$ -sheets, respectively. <sup>c</sup> Defined in Fig. 3a. <sup>d</sup> The second perturbation energy (kcal mol<sup>-1</sup>) of the lone pair orbitals of the carbonyl oxygen with the corresponding N–H (or C–H) antibonding orbital calculated at the M06-2X/cc-pVTZ level of theory. <sup>e</sup> The sum of  $\Delta E_2$  values in each strand.

**Table S2** Geometric parameters and strengths of inter-strand H-bonds of  $\beta$ -sheets of the Ac-( $\gamma$ Amc<sub>3</sub>-**1**)<sub>4</sub>-NHMe peptide<sup>a</sup>

| Type <sup>b</sup> | N–H $\cdots$ O H-bonds |                              |                                    |                    | C–H $\cdots$ O H-bonds |                              |                                    |                   |
|-------------------|------------------------|------------------------------|------------------------------------|--------------------|------------------------|------------------------------|------------------------------------|-------------------|
|                   | HB <sup>c</sup>        | $d(\text{NH}\cdots\text{O})$ | $\theta(\text{N–H}\cdots\text{O})$ | $\Delta E_2^d$     | HB <sup>c</sup>        | $d(\text{CH}\cdots\text{O})$ | $\theta(\text{C–H}\cdots\text{O})$ | $\Delta E_2^d$    |
| <b>p</b>          | I <sub>a</sub>         | 1.93                         | 172.2                              | 8.58               | II <sub>a</sub>        | 2.61                         | 140.1                              | 0.17              |
|                   | I <sub>b</sub>         | 1.90                         | 164.2                              | 8.36               | II <sub>b</sub>        | 2.51                         | 134.6                              | 0.55              |
|                   | I <sub>c</sub>         | 1.93                         | 164.1                              | 7.81               | II <sub>c</sub>        | 2.45                         | 138.2                              | 0.70              |
|                   | I <sub>d</sub>         | 1.93                         | 161.5                              | 8.37               | II <sub>d</sub>        | 2.37                         | 138.9                              | 0.84              |
|                   | I <sub>e</sub>         | 1.93                         | 167.6                              | 6.26               | II <sub>e</sub>        | 2.48                         | 139.0                              | 0.90              |
|                   | av.                    | 1.92                         | 165.9                              | 39.38 <sup>e</sup> | av.                    | 2.48                         | 138.2                              | 3.16 <sup>e</sup> |
| <b>ap</b>         | I <sub>a</sub> '       | 1.96                         | 166.2                              | 6.44               | II <sub>a</sub> '      | 2.50                         | 136.7                              | 0.29              |
|                   | I <sub>b</sub> '       | 1.95                         | 161.9                              | 7.83               | II <sub>b</sub> '      | 2.28                         | 143.8                              | 1.37              |
|                   | I <sub>c</sub> '       | 1.99                         | 170.5                              | 5.83               | II <sub>c</sub> '      | 2.59                         | 138.4                              | 0.17              |
|                   | I <sub>d</sub> '       | 1.99                         | 161.7                              | 5.54               | I <sub>d</sub> '       | 2.30                         | 143.7                              | 1.43              |
|                   | I <sub>e</sub> '       | 1.98                         | 162.3                              | 6.41               | II <sub>e</sub> '      | 2.48                         | 140.1                              | 0.27              |
|                   | av.                    | 1.97                         | 164.5                              | 32.05 <sup>e</sup> | av.                    | 2.43                         | 140.6                              | 3.53 <sup>e</sup> |

<sup>a</sup> Optimized at the M06-2X/6-31+G(d) level of theory; all distances and angles are in Å and degrees, respectively. <sup>b</sup> **p** and **ap** denote parallel and antiparallel  $\beta$ -sheets, respectively. <sup>c</sup> Defined in Fig. 3b. <sup>d</sup> The second perturbation energy (kcal mol<sup>-1</sup>) of the lone pair orbitals of the carbonyl oxygen with the corresponding N–H (or C–H) antibonding orbital calculated at the M06-2X/cc-pVTZ level of theory. <sup>e</sup> The sum of  $\Delta E_2$  values in each strand.

**Table S3** Geometric parameters and strengths of inter-strand H-bonds of  $\beta$ -sheets of the Ac-( $\gamma$ Amc<sub>3</sub>-**1**)<sub>6</sub>-NHMe peptide<sup>a</sup>

| Type <sup>b</sup> | N–H $\cdots$ O H-bonds |                              |                                    |                    | C–H $\cdots$ O H-bonds |                              |                                    |                   |
|-------------------|------------------------|------------------------------|------------------------------------|--------------------|------------------------|------------------------------|------------------------------------|-------------------|
|                   | HB <sup>c</sup>        | $d(\text{NH}\cdots\text{O})$ | $\theta(\text{N–H}\cdots\text{O})$ | $\Delta E_2^d$     | HB <sup>c</sup>        | $d(\text{CH}\cdots\text{O})$ | $\theta(\text{C–H}\cdots\text{O})$ | $\Delta E_2^d$    |
| <b>p</b>          | I <sub>a</sub>         | 1.93                         | 171.2                              | 8.31               | II <sub>a</sub>        | 2.59                         | 139.8                              | 0.18              |
|                   | I <sub>b</sub>         | 1.90                         | 164.7                              | 8.31               | II <sub>b</sub>        | 2.50                         | 135.3                              | 0.59              |
|                   | I <sub>c</sub>         | 1.93                         | 164.0                              | 7.86               | II <sub>c</sub>        | 2.44                         | 138.6                              | 0.70              |
|                   | I <sub>d</sub>         | 1.93                         | 163.6                              | 7.69               | II <sub>d</sub>        | 2.45                         | 138.0                              | 0.71              |
|                   | I <sub>e</sub>         | 1.93                         | 163.6                              | 7.66               | II <sub>e</sub>        | 2.44                         | 138.4                              | 0.74              |
|                   | I <sub>f</sub>         | 1.92                         | 161.8                              | 8.55               | II <sub>f</sub>        | 2.36                         | 139.2                              | 0.88              |
|                   | I <sub>g</sub>         | 1.93                         | 166.9                              | 6.16               | II <sub>g</sub>        | 2.46                         | 139.5                              | 0.97              |
|                   | av.                    | 1.93                         | 165.1                              | 54.54 <sup>e</sup> | av.                    | 2.46                         | 138.4                              | 4.77 <sup>e</sup> |
| <b>ap</b>         | I <sub>a</sub> '       | 1.95                         | 167.1                              | 6.32               | II <sub>a</sub> '      | 2.48                         | 138.4                              | 0.26              |
|                   | I <sub>b</sub> '       | 1.99                         | 162.8                              | 5.58               | II <sub>b</sub> '      | 2.37                         | 143.2                              | 1.04              |
|                   | I <sub>c</sub> '       | 2.01                         | 158.6                              | 5.51               | II <sub>c</sub> '      | 2.31                         | 141.3                              | 1.28              |
|                   | I <sub>d</sub> '       | 2.02                         | 161.1                              | 6.25               | II <sub>d</sub> '      | 2.30                         | 144.3                              | 0.60              |
|                   | I <sub>e</sub> '       | 2.02                         | 165.5                              | 5.39               | II <sub>e</sub> '      | 2.43                         | 143.2                              | 0.28              |
|                   | I <sub>f</sub> '       | 2.02                         | 159.0                              | 4.72               | II <sub>f</sub> '      | 2.31                         | 139.4                              | 1.29              |
|                   | I <sub>g</sub> '       | 1.99                         | 161.8                              | 6.46               | II <sub>g</sub> '      | 2.46                         | 139.3                              | 0.31              |
|                   | av.                    | 2.00                         | 162.3                              | 40.23 <sup>e</sup> | av.                    | 2.38                         | 141.3                              | 5.06 <sup>e</sup> |

<sup>a</sup> Optimized at the M06-2X/6-31+G(d) level of theory; all distances and angles are in Å and degrees, respectively. <sup>b</sup> **p** and **ap** denote parallel and antiparallel  $\beta$ -sheets, respectively. <sup>c</sup> Defined in Fig. 3c. <sup>d</sup> The second perturbation energy (kcal mol<sup>-1</sup>) of the lone pair orbitals of the carbonyl oxygen with the corresponding N–H (or C–H) antibonding orbital calculated at the M06-2X/cc-pVTZ level of theory. <sup>e</sup> The sum of  $\Delta E_2$  values in each strand.

**Table S4** Deformation energies (kcal mol<sup>-1</sup>) of  $\beta$ -sheets of Ac-( $\gamma$ Amc<sub>3</sub>-**1**)<sub>n</sub>-NHMe peptides<sup>a</sup>

| <i>n</i> | Type <sup>b</sup> | $\Delta E_{\text{def,A}}^c$ | $\Delta E_{\text{def,B}}^c$ | $\Delta E_{\text{def}}^d$ |
|----------|-------------------|-----------------------------|-----------------------------|---------------------------|
| 2        | <b>p</b>          | 1.24                        | 0.80                        | 2.04                      |
|          | <b>ap</b>         | 0.33                        | 0.97                        | 1.29                      |
| 4        | <b>p</b>          | 2.20                        | 1.72                        | 3.92                      |
|          | <b>ap</b>         | 2.57                        | 1.27                        | 3.84                      |
| 6        | <b>p</b>          | 3.11                        | 2.94                        | 6.06                      |
|          | <b>ap</b>         | 3.66                        | 2.36                        | 6.02                      |

<sup>a</sup> Calculated at the M06-2X/cc-pVTZ level of theory without BSSE corrections. <sup>b</sup> **p** and **ap** denote parallel and antiparallel  $\beta$ -sheets, respectively. <sup>c</sup> Relative deformation energies of each strand of  $\beta$ -sheets. <sup>d</sup> The sum of  $\Delta E_{\text{def,A}}$  and  $\Delta E_{\text{def,B}}$ .
